# Supplementary material
Source: PubMed Central journal article supplement (PMC8277144)
Supplement: joces-134-248187-s1.pdf [file joces-134-248187-s1.pdf]

Fig. S1. (A) Clustal Omega alignment of B' family

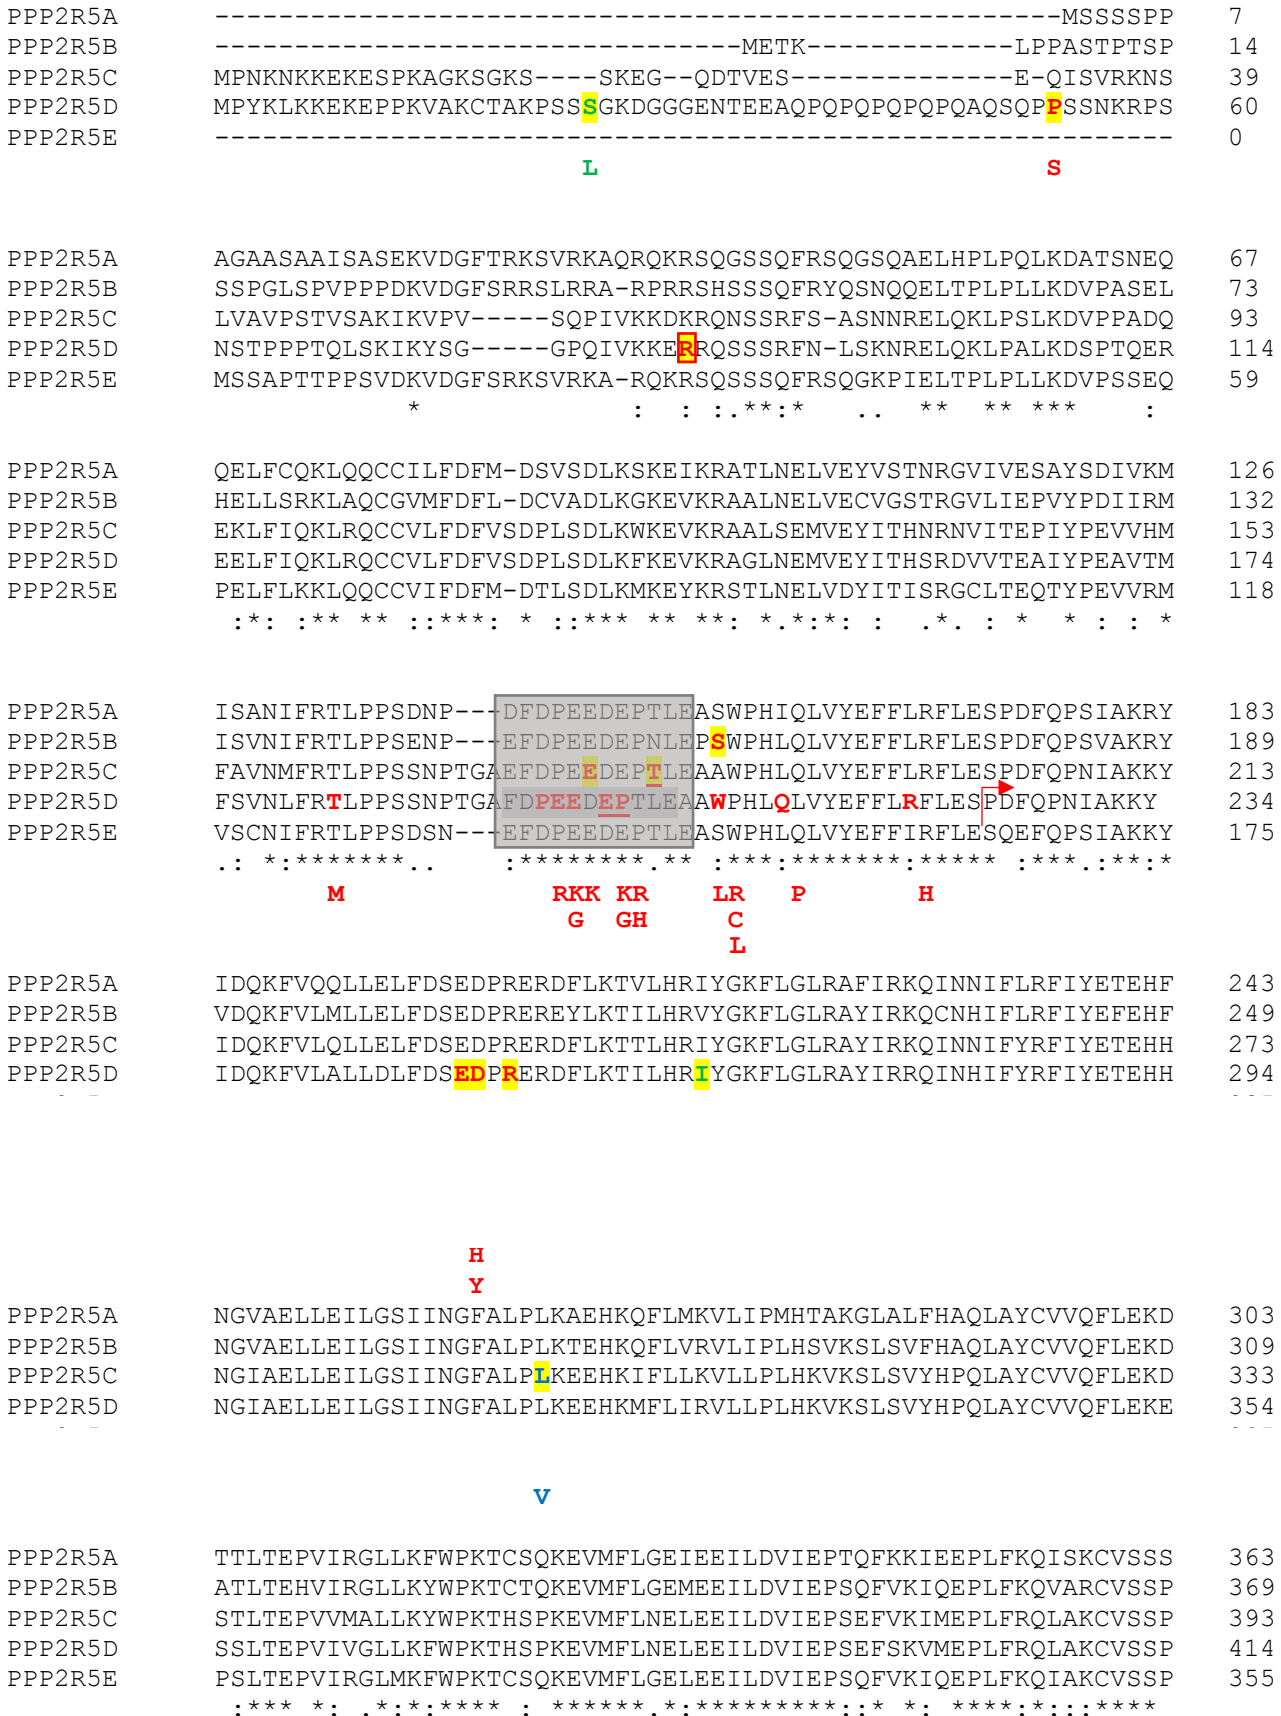

|         |                                                                                                    |     |
|---------|----------------------------------------------------------------------------------------------------|-----|
| PPP2R5A | HFQVAERALYFWNNEYILSLIEENIDKILPIMFASLYKISKEHWNPTIVALVYNVLKTLM                                       | 423 |
| PPP2R5B | HFQVAERALYFWNNEYILSLIEDNCHTVLPAVFGTLYQVSKEHWNQTIVSLIYNVLKTFM                                       | 429 |
| PPP2R5C | HFQVAERALYFWNNEYIMSLISDNAAKILPIMFPSLYRNSKTHWNKTIHGLIYNALKLFM                                       | 453 |
| PPP2R5D | HFQVAERALYFWNNEYIMSLISDNAARVLPIMFPALYRNSKSHWNKTIHGLIYNALKLFM                                       | 474 |
| PPP2R5E | HFQVAERALYFWNNEYIMSLIEENSIVILPIMFSSLYRISKEHWNPAIVALVYNVLKAFM                                       | 415 |
|         | *****:*****:***.:* :** :* :** : * * * * : * .*:**.* * :*                                           |     |
|         | <b>K</b> <span style="margin-left: 200px;"><b>K</b></span>                                         |     |
|         |                                                                                                    |     |
| PPP2R5A | EMNGKLFDDLTSSYKAERQREKKKELEEREELWKKLEELKLLKKALEKQNSAYNMHS-----                                     | 478 |
| PPP2R5B | EMNGKLFDELTASYKLEKQQEQQKAQERQELWQGLEELRLRRLQGTQGAKEAPLQ-----                                       | 484 |
| PPP2R5C | EMNQKLFDDCTQQFKAEKLEKLEKMKEREAAWVKIENLAKANPQYTVYSQASTMSIPVAM                                       | 513 |
| PPP2R5D | EMNQKLFDDCTQQYKAQKGRFRMKEREEMWQKIEELARLNPOYPMFRAVPPPLPPVYSM                                        | 534 |
| PPP2R5E | EMNSTMFDELTATYKSDRQREKKKEKEREELWKKLEDELELKRGLRRDGIIP-----                                          | 467 |
|         | *** .:***: * :* :: : : : **:* * :*: * .                                                            |     |
|         | <span style="margin-left: 200px;"><b>S</b></span> <span style="margin-left: 50px;"><b>L</b></span> |     |
|         |                                                                                                    |     |
| PPP2R5A | ----- ILSNTSAE-----                                                                                | 486 |
| PPP2R5B | ----- RLTPQVAASGGQS-----                                                                           | 497 |
| PPP2R5C | ETDGPLFEDVQMLRKTVKDEAHQAQKDPKKDRPLARRKSELQDPHTKKALEAHCRADEL                                        | 573 |
| PPP2R5D | ETETPTAEDIQLLKRTVETEAVQMLKDIKKEKVLRLRRKSELQDVYTIKALEAHKRAEEF                                       | 594 |
| PPP2R5E | -----                                                                                              | 467 |
|         | <b>V</b> <span style="margin-left: 200px;"><b>V</b></span>                                         |     |
|         |                                                                                                    |     |
| PPP2R5A | ----- 486                                                                                          |     |
| PPP2R5B | ----- 497                                                                                          |     |
| PPP2R5C | ASQDGR-- 579                                                                                       |     |
| PPP2R5D | LTASQEAL 602                                                                                       |     |
| PPP2R5E | ----- 467                                                                                          |     |

**Fig. S1 (B). Clustal Omega alignment of B" family**

|         |                                                               |      |
|---------|---------------------------------------------------------------|------|
| PPP2R3A | DFAQELVECKSSRGSLSQEKEMMQI----LQETLTTSSQANLSVCRSPVGDKAKDTTSAV  | 656  |
| PPP2R3B | -----MPPGKVLQPVLKMKVDELFLYWLSEASTQRMLQDCLRRIKAPGRDQPTPG       | 50   |
| PPP2R3C | -----                                                         | 0    |
| PPP2R3A | LIQQ-----TPEVIKIQNKPEKKPGTPLPPPATSPSSPRPLSPVPHVNN-----        | 700  |
| PPP2R3B | DGEQPGAWPTAPLAAPRPSGLEPPGTGPGGPALPLGAASSPRNAPHVRGTRRSAGTRVV-  | 109  |
| PPP2R3C | -----MDWKEV-----LRRRLATPNTCPNKKKS-----EQELKDEEMDLFTKYYS       | 40   |
|         | . . ** * . . . . .                                            |      |
| PPP2R3A | -----VVNAPLSINIPRFYFPEGLPDTCSNHEQTLRSRIETAFMDIEEQKAD-----     | 746  |
| PPP2R3B | QTRKEEPLPPATSQSIPTFYFPRGRPQDSVNVDAVISKIESTFARFPHERAT-----     | 161  |
| PPP2R3C | EWKGGKNTNEFYKTI PRFYRPAEDEVLLQK-LREESRAVFLQRKSRELLDNEELQNL    | 99   |
|         | . ** **: : . . . . *                                          |      |
| PPP2R3A | -----IYEMGKIAKVCGCPLYWKAPMFRAA-GGEKTGFVTAQ                    | 782  |
| PPP2R3B | -----MDDMGLVAKACGCPLYWKGPLFYGA-GGERTGSVSVH                    | 197  |
| PPP2R3C | WFLLDKHQTPPMIGEEAMINYENFLKVG-EKAGAKCKQFFTAKVFAKLLHTDSYGRISIM  | 158  |
|         | : : * . * : : : * : * :                                       |      |
|         | <b>Q</b>                                                      |      |
| PPP2R3A | SFIA-MWRKLLNNHDDASKFICLLAKPNCSSLEQEDFIPLLQDVVDTHPGLTFLKDAPE   | 841  |
| PPP2R3B | KFVA-MWRKILQNCHDDAAKFVHLLMSPGCNYLVQEDFVFPFLQDVVNTHPGLSFLKEASE | 256  |
| PPP2R3C | QFFNYVMRKVWLH---QTRIGLSLYDVAGQGYLRESDLIENYILELIPTLPQLDGLG--KS | 213  |
|         | .* : **: : : : * . . * : : : : * * * * : .                    |      |
|         | <b>S</b>                                                      |      |
| PPP2R3A | FHSRYITTVIQRIFYTVNRSWSGKITSTEIRKSNFLQTLALLEEEE--DINQITDYFSYE  | 899  |
| PPP2R3B | FHSRYITTVIQRIFYAVNRSWSGRITCAELRRSSFQNVALLEEEA--DINQLTEFFSYE   | 314  |
| PPP2R3C | FYSFYVCTAVRKFFFLDPLRTGKIKIQDILACSFLLDLLELRDEELSKESQETNWFSA    | 273  |
|         | * : * : * : : : : : : : : : : : * : * . . * : : *             |      |
| PPP2R3A | HFYVIYCKFWELDTDHDLYISQADLSRYNDQASSRIIERIFSGAVTRGKTIQKEGRMSY   | 959  |
| PPP2R3B | HFYVIYCKFWELDTDHDLLIDADDLARHNDHALSTKMIDRIFSGAVTRGRKVQKEGKISY  | 374  |
| PPP2R3C | SALRVYGQYLNLDKDHNGMLSKEELSRYGATMTNVFLDRVFQECLT-----YDGENDY    | 327  |
|         | : * : : : * : * : : . . : * : : : : . . * : * : * : *         |      |
| PPP2R3A | ADFVWFLISEEDKRNPTSIEYWFRCMDVDGDGVLSMYELEYFYEEQCERMEAMGIEPLPF  | 1019 |
| PPP2R3B | ADFVWFLISEEDKKTPTSIEYWFRCMDLDGDGALSMFELEYFYEEQCRRLDMAIEALPF   | 434  |
| PPP2R3C | KTYLDFVLALENRKEPAALQYIFKLLDIENKGYLNVFSLNYFFRAIQELMKIHGQDPVSF  | 387  |
|         | : : * : : * : : : * : : * : : * : * : . . . : : *             |      |
|         | <b>S</b>                                                      |      |
| PPP2R3A | HDLLCQMLDLVKPAVDGKITLRDLKRCRMAHIFYDTFFNLEKYLDHEQRDPFAVQKDVEN  | 1079 |
| PPP2R3B | QDCLCQMLDLVKPRTEGKITLQDLKRCRKLAVFFDFFNIEKYLDHEQKEQISLLRDGDS   | 494  |
| PPP2R3C | QDVKDEIFDMVKPKDPLKISLQDLINSNQDGTVTITLIDLNGFWTYENREALVANDSENS  | 447  |
|         | : * : : : * : * : * : * : * : . . . : : : : : * : : : : . .   |      |
| PPP2R3A | DGPEPSDWRFAAEYETLVAEESAQAQFQEGFEDYETDEPASPSFEGNKSNIKIL-----   | 1134 |
| PPP2R3B | GGPELSDWEKYAAEYDILVAEETAGEPWEDGFEAELSPVEQKLSALRSPLAQRPFPEAP   | 554  |
| PPP2R3C | A--DLDDT-----                                                 | 453  |
|         | : . *                                                         |      |
| PPP2R3A | -----SASLPEKCGKLSVDEE                                         | 1151 |
| PPP2R3B | SPLGAVDLYEYACGDEDLEPL-                                        | 575  |
| PPP2R3C | -----                                                         | 453  |

**Fig. S1. Sequence alignment showing the similarity within isoforms of the B' subunit family (A) and B'' subunit family (B).**

(A) Sequence alignment of human PP2A-B' subunits showing the conservation and diversity in protein sequence within B' family members where residues highlighted in yellow are mutations implicated in NDD identified from published studies and publicly available clinical databases. Mutated residues are color coded where residues in red are pathogenic, green are benign/ likely benign, and blue are of uncertain significance. Underlined GH mutation is an insertion/deletion mutation, underlined T mutation is deletion mutation, boxed residues are nonsense mutations, upward arrow shows the frame shift mutations leading to termination. Residues within the grey box make up the acidic loop in PP2A-B'. Accession number for protein sequences are Q15172, NP\_006235, NP\_001339842, NP\_006236 and NP\_001269108 for PPP2R5A, PPP2R5B, PPP2R5C, PPP2R5D, and PPP2R5E, respectively.

(B) Sequence alignment of human PP2A-B'' subunits showing the conservation and diversity in protein sequence within B'' family members. Color coding of the residues follows the same style as S2 (A). Accession number for protein sequences are NP\_002709; NP\_037371 and NP\_060387 for PPP2R3A, PPP2R3B and PPP2R3C, respectively

**Table S1**

[Click here to download Table S1](#)
